# Supplementary material for: Chimeras of Bet v 1 and Api g 1 reveal heterogeneous IgE responses in patients with birch pollen allergy
Source: PubMed Central journal article supplement (PMC4085476; doi:10.1016/j.jaci.2013.12.1073), 2014-07

**BIP 1**

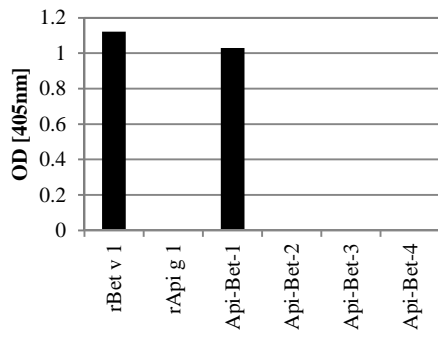

**BIP 4**

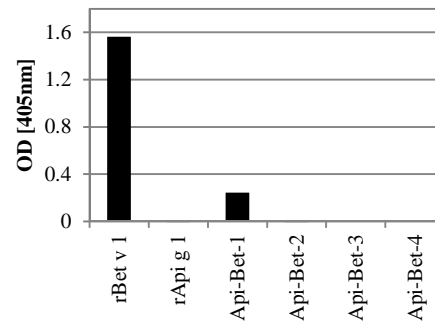

Supplement: mmc3.pdf [file mmc3.pdf]
